# Supplementary material
Source: Royal Society of Chemistry journal article supplement (doi:10.1039/d6ta02969h)
Supplement: d6ta02969h2.pdf [file d6ta02969h2.pdf]

## Supporting Information

### **Higher-order phonon scattering and lattice thermal conductivity prediction via machine learning**

Shengxian Liu, Kan Tang, Jian Zhou\* and Zhimei Sun\*

<sup>1</sup>School of Materials Science and Engineering, Beihang University, Beijing 100191, China.

\*Corresponding authors: [jzhou@buaa.edu.cn](mailto:jzhou@buaa.edu.cn) (J.Zhou), [zmsun@buaa.edu.cn](mailto:zmsun@buaa.edu.cn) (Z. M. Sun)

1 The weighted 3ph and 4ph phase space is written as<sup>1</sup>:

$$2 \quad WP_3(\lambda)^{(+)} = \frac{1}{N} \sum_{\lambda'\lambda''} \frac{n_{\lambda'}^0 - n_{\lambda''}^0}{\omega_{\lambda}\omega_{\lambda'}\omega_{\lambda''}} \delta(\omega_{\lambda} + \omega_{\lambda'} - \omega_{\lambda''}) \quad \backslash * \text{ MERGEFORMAT (1)}$$

$$3 \quad WP_3(\lambda)^{(-)} = \frac{1}{N} \sum_{\lambda'\lambda''} \frac{n_{\lambda'}^0 + n_{\lambda''}^0 + 1}{2\omega_{\lambda}\omega_{\lambda'}\omega_{\lambda''}} \delta(\omega_{\lambda} - \omega_{\lambda'} - \omega_{\lambda''}) \quad \backslash * \text{ MERGEFORMAT (2)}$$

$$4 \quad WP_4(\lambda)^{(++)} = \frac{1}{N^2} \sum_{\lambda'\lambda''\lambda'''} \frac{(1+n_{\lambda'}^0)(1+n_{\lambda''}^0)n_{\lambda'''}^0}{2n_{\lambda}^0} \frac{\delta(\omega_{\lambda} + \omega_{\lambda'} + \omega_{\lambda''} - \omega_{\lambda'''})}{\omega_{\lambda}\omega_{\lambda'}\omega_{\lambda''}\omega_{\lambda'''}} \backslash * \text{ MERGEFORMAT (3)}$$

$$5 \quad WP_4(\lambda)^{(+)} = \frac{1}{N^2} \sum_{\lambda'\lambda''\lambda'''} \frac{(1+n_{\lambda'}^0)n_{\lambda''}^0n_{\lambda'''}^0}{2n_{\lambda}^0} \frac{\delta(\omega_{\lambda} + \omega_{\lambda'} - \omega_{\lambda''} - \omega_{\lambda'''})}{\omega_{\lambda}\omega_{\lambda'}\omega_{\lambda''}\omega_{\lambda'''}} \backslash * \text{ MERGEFORMAT (4)}$$

$$6 \quad WP_4(\lambda)^{(-)} = \frac{1}{N^2} \sum_{\lambda'\lambda''\lambda'''} \frac{n_{\lambda'}^0n_{\lambda''}^0n_{\lambda'''}^0}{6n_{\lambda}^0} \frac{\delta(\omega_{\lambda} - \omega_{\lambda'} - \omega_{\lambda''} - \omega_{\lambda'''})}{\omega_{\lambda}\omega_{\lambda'}\omega_{\lambda''}\omega_{\lambda'''}} \backslash * \text{ MERGEFORMAT (5)}$$

7 where  $n_{\lambda}^0$  is the phonon Bose-Einstein distribution at equilibrium,  $\omega_{\lambda}$  is the phonon

8 frequency for a certain mode  $\lambda$ .

9

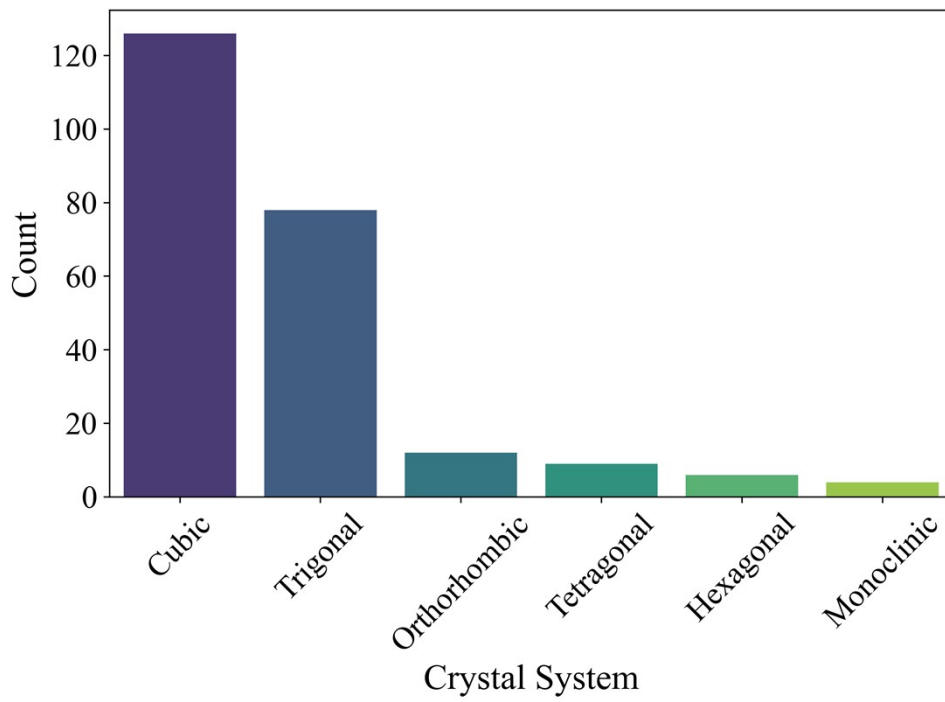

10

11 **Fig. S1** Distribution of Materials Across Different Crystal Systems

12

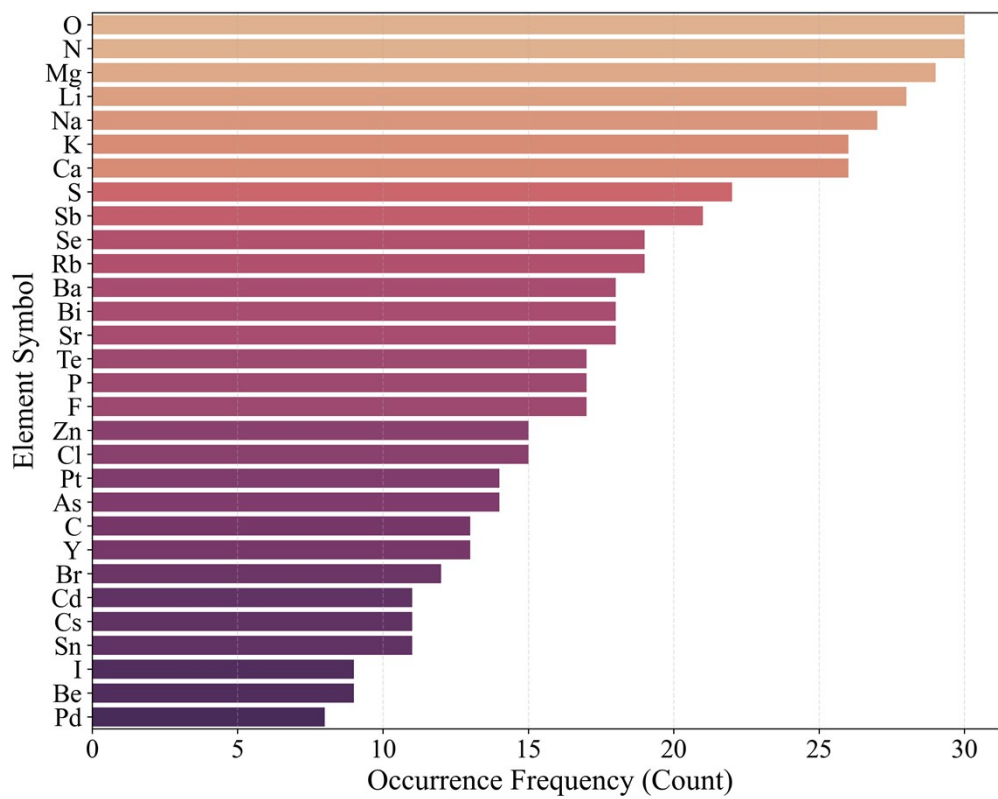

13

14 **Fig. S2** Elemental Composition Analysis: Frequency of Element Occurrence

15

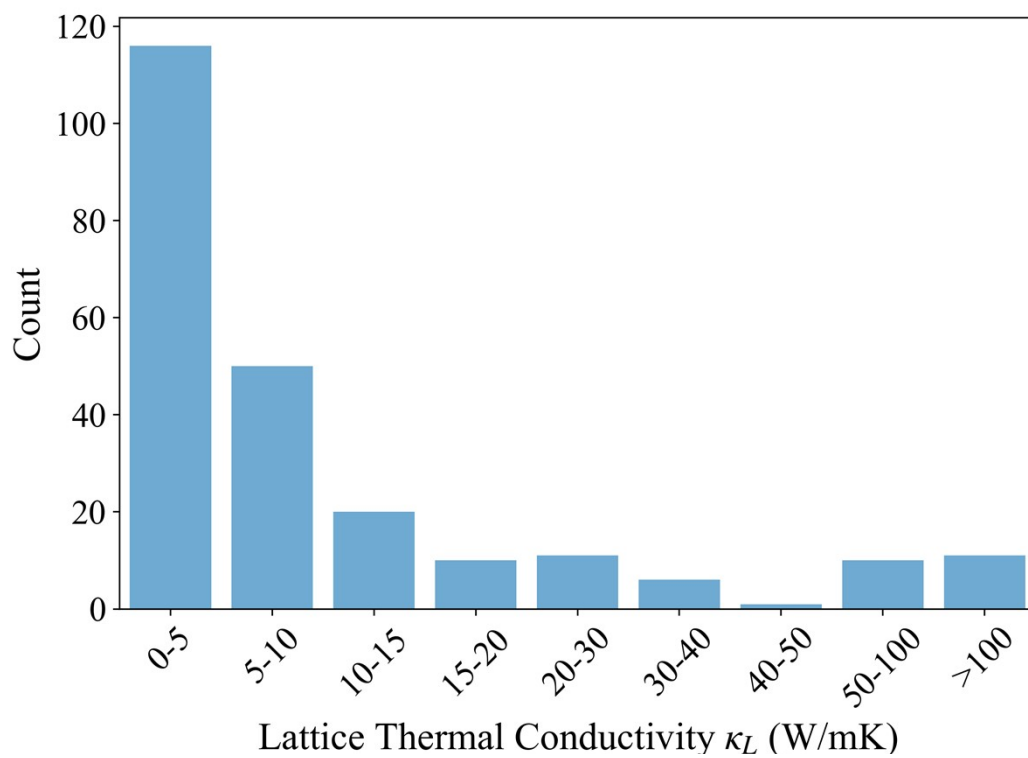

16

17

18 **Fig. S3** Statistical Distribution of Calculated  $\kappa_{3ph}$

19

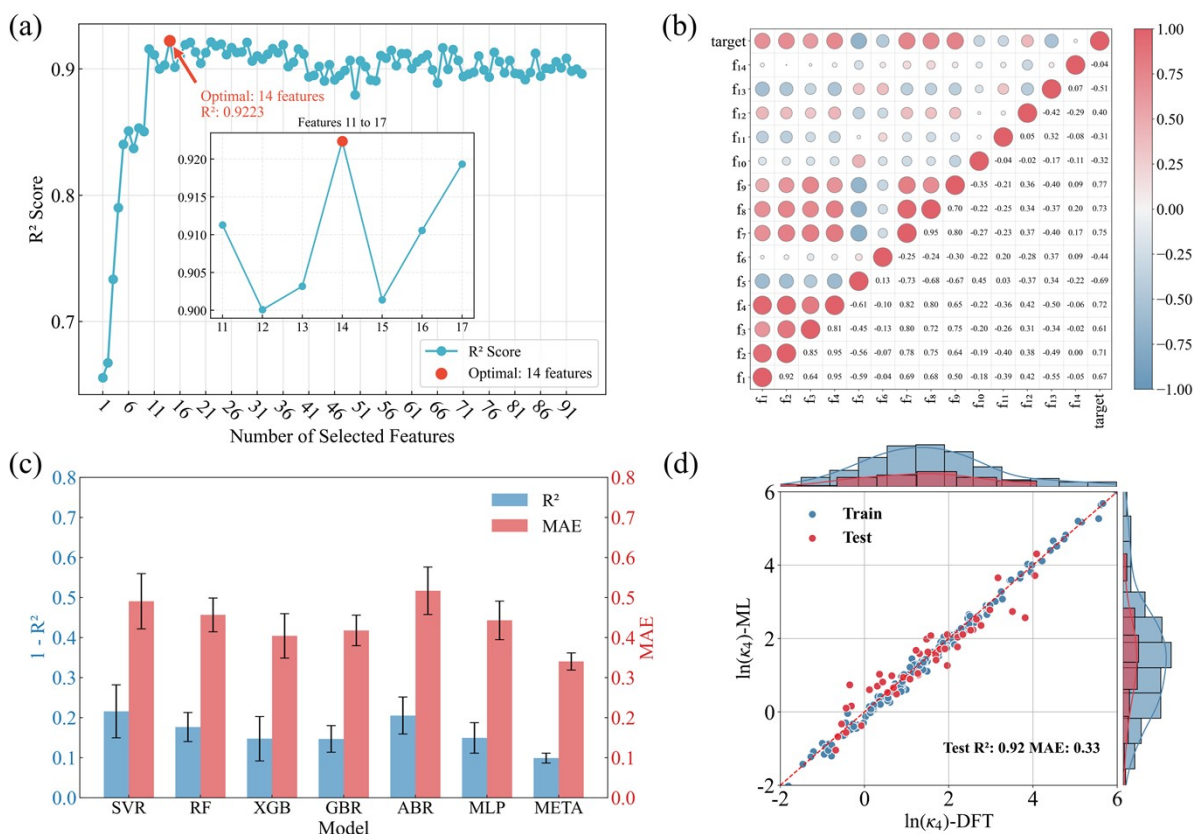

20

21 **Fig. S4** (a) Recursive feature elimination results identify 14 optimal features achieving an  $R^2$   
 22 score of 0.9223. (b) Heatmap of the Pearson correlation between the selected 14 features and  
 23  $\kappa_{3ph}$ . (c) 5-fold cross-validation  $1 - R^2$  and MAE scores of six traditional ML models and the  
 24 META model. (d) Scatter plots comparing the predicted values of the  $\kappa_{4ph}$  model and the DFT  
 25 calculated values on the training and test sets.

26

27 The  $\kappa_{4ph}$  model identifies 14 optimal features through recursive feature elimination (RFE).  
 28 Inter-feature correlation analysis removes the highly correlated features  $f_1$ ,  $f_2$ , and  $f_8$ , resulting  
 29 in a final optimized feature set of 11 features. Under 5-fold cross-validation, the META model  
 30 achieves an average  $R^2$  of 0.90 and a mean absolute error (MAE) of 0.34. The best-performing  
 31 fold is shown in **Fig. S4d**, with an  $R^2$  of 0.92 and an MAE of 0.35.

32

33 **Table S1** Categorization and summary of the initial 90 candidate descriptors used in the  
 34 machine learning workflow.

35

| Category         | Features                                                                 | n  |
|------------------|--------------------------------------------------------------------------|----|
| Components       | Atomic radii, Electronegativity, Melting, Boiling...                     | 62 |
| Structure        | Volume, Spacegroup, Lattice constant...                                  | 10 |
| DFT calculations | B, G, $v$ , Grüneisen, $\kappa_{\text{slack}}$ , $f_{a, \text{max}}$ ... | 18 |

36

37 To ensure model transparency, 90 initial descriptors were grouped into three functional  
 38 categories. The Components set (62 features) covers intrinsic elemental properties such as  
 39 atomic radii and electronegativity. The Structure set (10 features) captures lattice geometry and  
 40 symmetry, including volume and lattice constants. The DFT calculations set (18 features)  
 41 includes primary physical properties derived from basic DFT calculations, such as elastic  
 42 moduli (B, G),  $f_{a, \text{max}}$ , and the Grüneisen parameter, providing a robust physical foundation for  
 43 the machine learning model.

44

45 **Table S2** Initial feature set for the  $\kappa_{3\text{ph}}$  model.

|       |                         |                                                        |
|-------|-------------------------|--------------------------------------------------------|
| $f_1$ | E                       | Young's modulus                                        |
| $f_2$ | $\kappa_{\text{slack}}$ | Semi-empirical formula for $\kappa_L$                  |
| $f_3$ | $V_{\text{prim}}$       | Volume of the primitive cell                           |
| $f_4$ | Grüneisen               | Grüneisen constant                                     |
| $f_5$ | $f_{a, \text{max}}$     | The maximum frequency of the acoustic branch           |
| $f_6$ | $v_{a, \text{average}}$ | The average group velocity of the acoustic phonon      |
| $f_7$ | $f_{o, \text{min}}$     | The minimum frequency of the optical branch            |
| $f_8$ | $f_{\Delta O2}$         | The band gap between the acoustic and optical branches |
| $f_9$ | $\Phi_{\text{min}}$     | The minimum electronegativity among elements           |

|          |                               |                                                     |
|----------|-------------------------------|-----------------------------------------------------|
| $f_{10}$ | $E_{p, \min}$                 | The minimum energy of P-orbital                     |
| $f_{11}$ | $n_{p\text{-unfilled, mean}}$ | The average number of unfilled p-electron states    |
| $f_{12}$ | $MN_{\text{mean}}$            | The average Mendeleev number among elements         |
| $f_{13}$ | $V_{\text{mol, min}}$         | The minimum molar volume of all elemental solid     |
| $f_{14}$ | $V_{\text{mol, mode}}$        | The mode of the molar volume of all elemental solid |

46

47

**Table S3** Initial feature set for the  $\kappa_{4\text{ph}}$  model.

|          |                              |                                                              |
|----------|------------------------------|--------------------------------------------------------------|
| $f_1$    | B                            | Bulk Modulus                                                 |
| $f_2$    | E                            | Young's modulus                                              |
| $f_3$    | $V_{\text{prim}}$            | Volume of the primitive cell                                 |
| $f_4$    | $\kappa_{\text{slack}}$      | Semi-empirical formula for $\kappa_L$                        |
| $f_5$    | $\kappa_{\text{experience}}$ | Semi-empirical formula for $\kappa_L$                        |
| $f_6$    | Grüneisen                    | Grüneisen constant                                           |
| $f_7$    | $f_{a, \max}$                | The maximum frequency of the acoustic branch                 |
| $f_8$    | $v_{a, \text{mean}}$         | The average group velocity of the acoustic phonon            |
| $f_9$    | $f_{o, \min}$                | The minimum frequency of the optical branch                  |
| $f_{10}$ | $d_{\text{std}}$             | The standard deviation of all atomic distances               |
| $f_{11}$ | $EA_{\text{std}}$            | The standard deviation of electron affinities among elements |
| $f_{12}$ | $MN_{\text{mean}}$           | The average Mendeleev number among elements                  |
| $f_{13}$ | $V_{\text{mol, min}}$        | The minimum molar volume of all elemental solid              |
| $f_{14}$ | $I_{\text{std}}$             | The standard deviation of ionization energies among elements |

48

49 The  $\kappa_{\text{slack}}$  and  $\kappa_{\text{experience}}$  is written as:

$$\kappa_{\text{slack}} = A(\gamma) \frac{\overline{M}\theta_D^3 \delta}{\gamma^2 n^{2/3} T} (T \geq \theta_D)^2 \quad \backslash * \text{MERGEFORMAT (6)}$$

$$\kappa_{\text{experience}} = A_1 \frac{\overline{M}v_s^3}{V^{2/3} n^{1/3}} + A_2 \frac{v_s}{V^{2/3}} \left(1 - \frac{1}{n^{2/3}}\right)^3 \quad \backslash * \text{MERGEFORMAT (7)}$$

52 where  $A(\gamma) = 2.43 \times 10^7 / (1 - 0.514/\gamma + 0.228/\gamma^2)$ ,  $\overline{M}$  is the average atomic mass,  $\delta^3$  is the53 average volume per atom in the unit cell,  $\theta_D$  is the Debye temperature,  $T$  is the absolute

54 temperature, and  $\gamma$  is the Grüneisen parameter.

55       Where  $\bar{M}$ ,  $V$ , and  $n$  are the average atomic mass, the average volume per atom, and the  
56 number of atoms in the primitive cell of each material, respectively. And  $v_s$  is the speed of  
57 sound, which can be estimated by  $(B/d)^{1/2}$ , where  $B$  and  $d$  are the bulk modulus and density of  
58 the material, respectively.  $A_1$  and  $A_2$  are fitting parameters.

59

60

61 **Table. S4** Comparison of optimized input features, DFT-calculated  $\kappa_{3\text{ph}}$ , and META model  
62 predicted values for the 3ph scattering model, where mp-id/Ref. denotes the material ID in the  
63 Materials Project database or the corresponding reference, E is the Young's modulus,  $\kappa_{\text{slack}}$  is  
64 the Slack equation-derived thermal conductivity,  $V_{\text{prim}}$  is the primitive cell volume, Grüneisen  
65 is the Grüneisen parameter,  $f_{\text{a, max}}$  and  $f_{\text{o, min}}$  are the maximum acoustic and minimum optical  
66 frequencies,  $f_{\text{AO2}}$  is the acoustic-optical band gap,  $\Phi_{\text{min}}$  is the minimum electronegativity,  $E_{\text{p, min}}$   
67 is the minimum P-orbital energy,  $n_{\text{p-unfilled, mean}}$  is the average number of unfilled p-electron  
68 states,  $MN_{\text{mean}}$  is the average Mendeleev number,  $V_{\text{mol, min}}$  and  $V_{\text{mol, mode}}$  are the minimum and  
69 mode of elemental molar volumes, and  $\kappa_{3\text{ph,DFT}}$  and  $\kappa_{3\text{ph,ML}}$  represent the lattice thermal  
70 conductivity from DFT calculations and META model predictions, respectively. For these 15  
71 data points, the MAE is 0.51.

72

| Formula               | mp-id/Ref | E<br>(GPa) | $\kappa_{\text{slack}}$<br>(W/m·K) | $V_{\text{prim}}$<br>(Å <sup>3</sup> ) | Grüneisen | $f_{\text{a, max}}$<br>(THz) | $f_{\text{o, min}}$<br>(THz) | $f_{\text{AO2}}$<br>(THz) |
|-----------------------|-----------|------------|------------------------------------|----------------------------------------|-----------|------------------------------|------------------------------|---------------------------|
| Mg(BeAs) <sub>2</sub> | mp-865185 | 113.28     | 9.07                               | 80.59                                  | 1.81      | 4.28                         | 1.82                         | 0.43                      |
| Ca(MgAs) <sub>2</sub> | mp-9564   | 87.20      | 8.65                               | 118.59                                 | 1.73      | 3.59                         | 2.23                         | 0.62                      |
| Ca <sub>2</sub> AsI   | mp-28554  | 46.69      | 3.66                               | 126.11                                 | 1.80      | 2.16                         | 1.22                         | 0.57                      |
| LiMgBi                | mp-570213 | 53.05      | 4.70                               | 79.29                                  | 1.75      | 2.56                         | 5.10                         | 1.99                      |
| NbFeSb                | mp-9437   | 207.42     | 19.42                              | 52.79                                  | 1.89      | 5.59                         | 5.12                         | 0.92                      |
| NaI                   | mp-23268  | 21.66      | 1.83                               | 69.55                                  | 1.83      | 2.28                         | 3.04                         | 1.34                      |
| Li <sub>2</sub> S     | mp-1153   | 79.12      | 14.08                              | 46.21                                  | 1.69      | 8.07                         | 7.47                         | 0.93                      |
| NbRuSb                | mp-505297 | 175.41     | 13.55                              | 59.21                                  | 1.98      | 4.95                         | 4.72                         | 0.95                      |
| ScNiSb                | mp-3432   | 162.17     | 18.94                              | 57.31                                  | 1.78      | 4.71                         | 4.88                         | 1.04                      |
| PbTiO <sub>3</sub>    | mp-20459  | 96.45      | 4.97                               | 68.78                                  | 1.81      | 2.57                         | 2.96                         | 1.15                      |
| LaGaTe <sub>2</sub>   | 4         | 37.38      | 1.28                               | 119.90                                 | 2.10      | 1.74                         | 1.05                         | 0.60                      |
| LaInTe <sub>2</sub>   | 4         | 43.63      | 1.79                               | 125.61                                 | 2.01      | 1.74                         | 1.28                         | 0.74                      |

|                      |   |       |      |        |      |      |      |      |
|----------------------|---|-------|------|--------|------|------|------|------|
| LaRbTe <sub>2</sub>  | 4 | 40.33 | 1.87 | 137.10 | 1.97 | 2.01 | 1.55 | 0.77 |
| Li <sub>2</sub> InBi | 5 | 70.76 | 5.10 | 89.38  | 1.75 | 1.99 | 1.38 | 0.69 |
| Li <sub>2</sub> TlBi | 5 | 83.73 | 6.11 | 92.38  | 1.74 | 1.66 | 1.55 | 0.94 |

73

| Formula               | $\Phi_{\min}$ | $E_{p, \min}$ | $n_{p\text{-unfilled, mean}}$ | $MN_{\text{mean}}$ | $V_{\text{mol, min}}$<br>(cm <sup>3</sup> /mol) | $V_{\text{mol, mode}}$<br>(cm <sup>3</sup> /mol) | $\kappa_{3\text{ph, DFT}}$<br>(W/m·K) | $\kappa_{3\text{ph, ML}}$<br>(W/m·K) |
|-----------------------|---------------|---------------|-------------------------------|--------------------|-------------------------------------------------|--------------------------------------------------|---------------------------------------|--------------------------------------|
| Mg(BeAs) <sub>2</sub> | 1.31          | 0.00          | 1.20                          | 81.00              | 4.85                                            | 4.85                                             | 5.955                                 | 5.845                                |
| Ca(MgAs) <sub>2</sub> | 1.00          | 0.00          | 1.20                          | 68.00              | 12.95                                           | 12.95                                            | 4.558                                 | 3.710                                |
| Ca <sub>2</sub> AsI   | 1.00          | 0.00          | 1.00                          | 54.50              | 12.95                                           | 26.20                                            | 1.450                                 | 1.297                                |
| LiMgBi                | 0.98          | 0.00          | 1.00                          | 57.33              | 13.02                                           | 13.02                                            | 3.917                                 | 2.796                                |
| NbFeSb                | 1.60          | 0.00          | 1.00                          | 67.33              | 7.09                                            | 7.09                                             | 17.367                                | 17.863                               |
| NaI                   | 0.93          | 0.00          | 0.50                          | 54.00              | 23.78                                           | 23.78                                            | 1.096                                 | 1.457                                |
| Li <sub>2</sub> S     | 0.98          | 0.00          | 0.67                          | 39.33              | 13.02                                           | 13.02                                            | 12.275                                | 13.753                               |
| NbRuSb                | 1.60          | 0.00          | 1.00                          | 67.67              | 8.17                                            | 8.17                                             | 12.514                                | 13.619                               |
| ScNiSb                | 1.36          | 0.00          | 1.00                          | 58.00              | 6.59                                            | 6.59                                             | 12.744                                | 12.880                               |
| PbTiO <sub>3</sub>    | 1.54          | 0.00          | 2.00                          | 87.20              | 10.64                                           | 17.36                                            | 2.749                                 | 2.493                                |
| LaGaTe <sub>2</sub>   | 1.10          | 0.00          | 2.25                          | 74.50              | 11.80                                           | 20.46                                            | 0.320                                 | 0.710                                |
| LaInTe <sub>2</sub>   | 1.10          | 0.00          | 2.25                          | 74.00              | 15.76                                           | 20.46                                            | 0.391                                 | 0.756                                |
| LaRbTe <sub>2</sub>   | 0.82          | 0.00          | 1.00                          | 56.50              | 20.46                                           | 20.46                                            | 1.061                                 | 0.986                                |
| Li <sub>2</sub> InBi  | 0.98          | 0.00          | 2.00                          | 47.50              | 13.02                                           | 13.02                                            | 1.550                                 | 1.855                                |
| Li <sub>2</sub> TlBi  | 0.98          | 0.00          | 2.00                          | 47.25              | 13.02                                           | 13.02                                            | 2.360                                 | 1.755                                |

74

75

76

77 **Table. S5.** Comparison of optimized input features, DFT-calculated  $\kappa_{4\text{ph,DFT}}$ , and META model  
78 predicted values for the 4ph scattering model, where mp-id denotes the material ID in the  
79 Materials Project database,  $\kappa_{\text{slack}}$  and  $\kappa_{\text{experience}}$  are the semi-empirical lattice thermal  
80 conductivities,  $V_{\text{prim}}$  is the primitive cell volume, Grüneisen is the Grüneisen parameter,  $f_{a, \text{max}}$   
81 and  $f_{o, \text{min}}$  are the maximum acoustic and minimum optical frequencies,  $d_{\text{std}}$  is the standard  
82 deviation of all atomic distances,  $EA_{\text{std}}$  is the standard deviation of electron affinities,  $MN_{\text{mean}}$   
83 is the average Mendeleev number,  $V_{\text{mol, min}}$  is the minimum elemental molar volume,  $I_{\text{std}}$  is the  
84 standard deviation of ionization energies, and  $\kappa_{4\text{ph,DFT}}$  and  $\kappa_{4\text{ph,ML}}$  represent the lattice thermal  
85 conductivity from DFT calculations and META model predictions, respectively. For these 6  
86 data points, the MAE is 0.33.

87

| Formula               | mp-id     | $\kappa_{\text{slack}}$<br>(W/m·K) | $\kappa_{\text{experience}}$<br>(W/m·K) | $V_{\text{prim}}$<br>(Å <sup>3</sup> ) | Grüneisen | $f_{a, \text{max}}$<br>(THz) | $f_{o, \text{min}}$<br>(THz) |
|-----------------------|-----------|------------------------------------|-----------------------------------------|----------------------------------------|-----------|------------------------------|------------------------------|
| Mg(BeAs) <sub>2</sub> | mp-865185 | 9.07                               | 6.33                                    | 80.59                                  | 1.81      | 4.28                         | 1.82                         |
| Ca <sub>2</sub> AsI   | mp-28554  | 3.66                               | 5.04                                    | 126.11                                 | 1.80      | 2.16                         | 1.22                         |
| NbFeSb                | mp-9437   | 19.42                              | 36.59                                   | 52.79                                  | 1.89      | 5.59                         | 5.12                         |
| NaI                   | mp-23268  | 1.83                               | 2.34                                    | 69.55                                  | 1.83      | 2.28                         | 3.04                         |
| Li <sub>2</sub> S     | mp-1153   | 14.08                              | 10.28                                   | 46.21                                  | 1.69      | 8.07                         | 7.47                         |
| NbRuSb                | mp-505297 | 13.55                              | 37.89                                   | 59.21                                  | 1.98      | 4.95                         | 4.72                         |

88

| Formula               | $d_{\text{std}}$ | $EA_{\text{std}}$ | $MN_{\text{mean}}$ | $V_{\text{mol, min}}$<br>(cm <sup>3</sup> /mol) | $I_{\text{std}}$ | $\kappa_{4\text{ph, DFT}}$<br>(W/m·K) | $\kappa_{4\text{ph, ML}}$<br>(W/m·K) |
|-----------------------|------------------|-------------------|--------------------|-------------------------------------------------|------------------|---------------------------------------|--------------------------------------|
| Mg(BeAs) <sub>2</sub> | 0.19             | 0.63              | 81.00              | 4.85                                            | 1.36             | 4.423                                 | 4.361                                |
| Ca <sub>2</sub> AsI   | 0.22             | 1.24              | 54.50              | 12.95                                           | 3.50             | 1.170                                 | 0.990                                |
| NbFeSb                | 0.00             | 0.39              | 67.33              | 7.09                                            | 1.00             | 13.320                                | 14.088                               |

|                   |      |      |       |       |       |        |        |
|-------------------|------|------|-------|-------|-------|--------|--------|
| NaI               | 0.00 | 1.26 | 54.00 | 23.78 | 14.08 | 0.979  | 1.164  |
| Li <sub>2</sub> S | 0.00 | 0.69 | 39.33 | 13.02 | 24.66 | 11.476 | 10.709 |
| NbRuSb            | 0.00 | 0.06 | 67.67 | 8.17  | 1.12  | 11.352 | 11.362 |

---

89

90

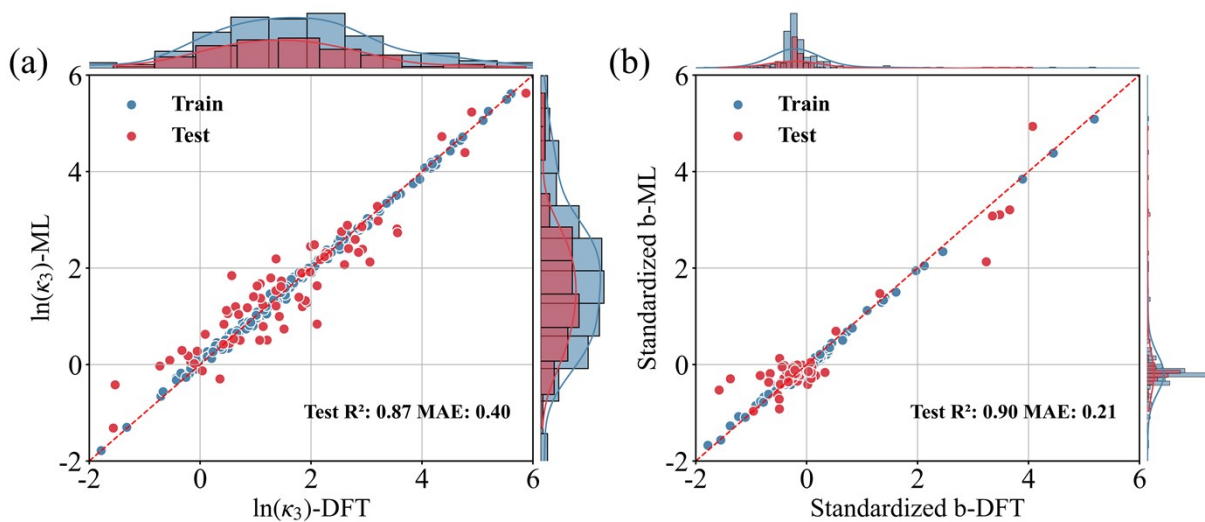

91

92 **Fig. S5** (a) Scatter plots comparing the predicted values of the dual-label regression model and  
 93 the DFT calculated values on the training and test sets.

94

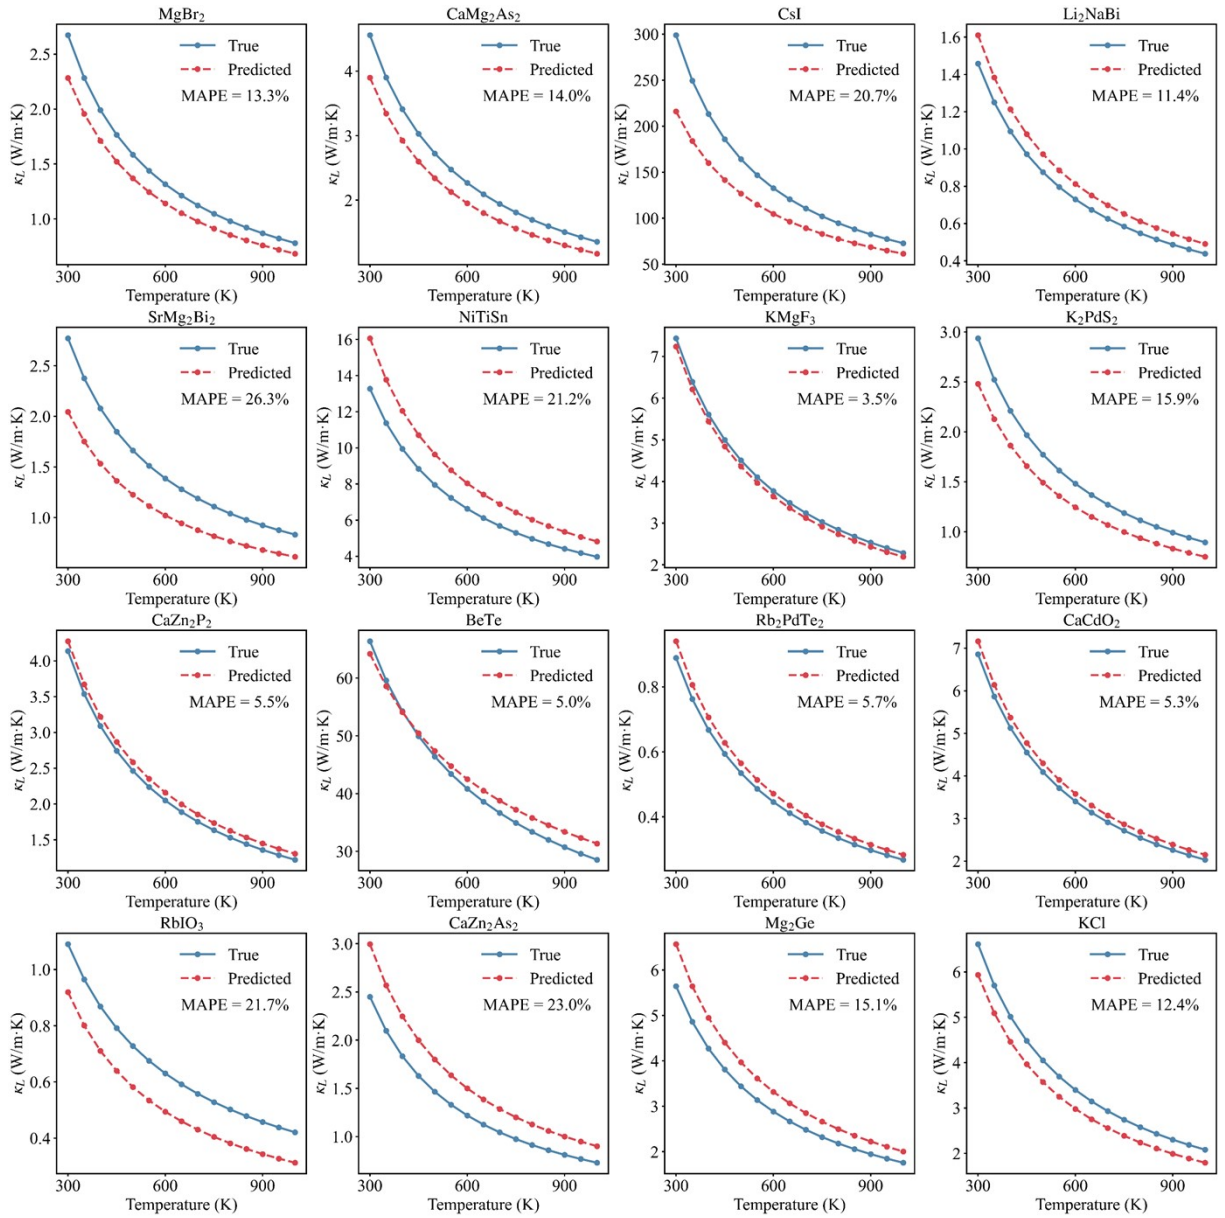

95

96 **Fig. S6** Comparison plot of the  $\kappa_{3ph}$  curve predicted by machine learning and the  $\kappa_{3ph}$  curve

97 calculated by DFT for a variety of material systems.

98

**Table S6** Phonon-related descriptors.

|   |                   |                                                      |
|---|-------------------|------------------------------------------------------|
| 1 | $f_{a, \max}$     | The maximum frequency of the acoustic branch         |
| 2 | $f_{o, \min}$     | The minimum frequency of the optical branch          |
| 3 | $f_{O1}$          | The frequency difference of the 456th optical branch |
| 4 | $f_{O2}$          | The maximum phonon band gap between phonon branches  |
| 5 | $f_{AO1}$         | $f_{o, \min} - f_{a, \max}$                          |
| 6 | $f_{AO2}$         | $f_{o, \min} / f_{a, \max}$                          |
| 7 | $f_{\text{mean}}$ | The weighted average frequency of phonons            |

100

101

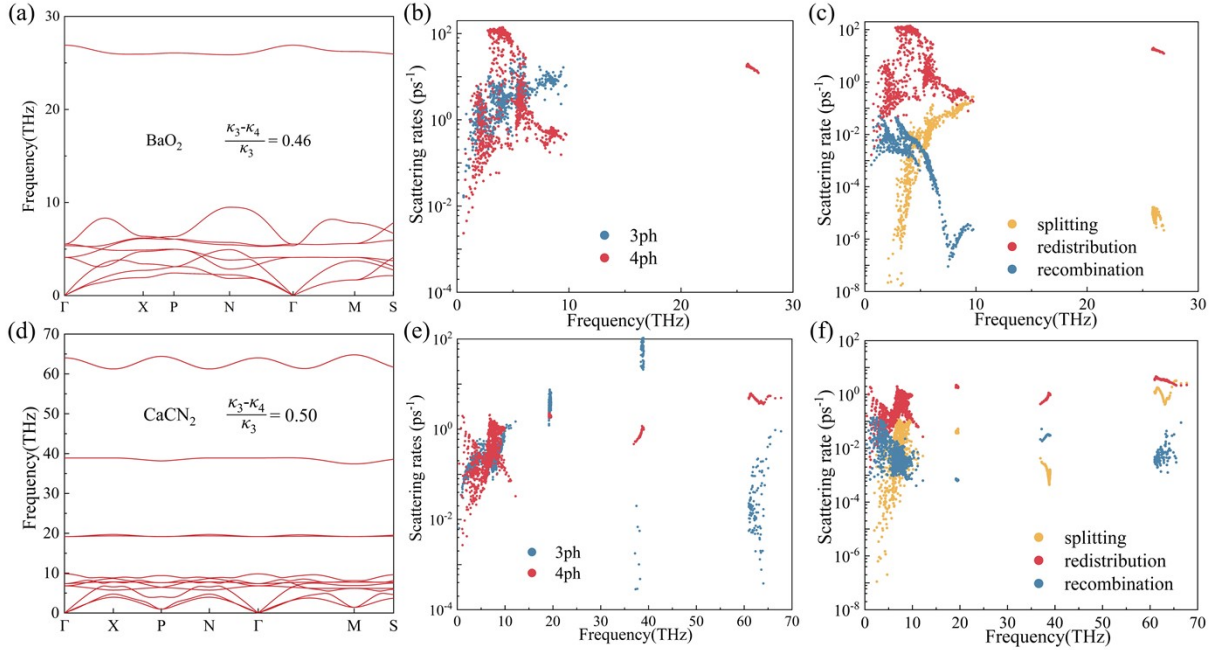

102

103 **Fig. S7** Phonon dispersions for (a) BaO<sub>2</sub> and (d) CaCN<sub>2</sub>. 3ph and 4ph scattering rates for (b)  
 104 BaO<sub>2</sub> and (e) CaCN<sub>2</sub>. 4ph scattering rates of different scattering process in (c) BaO<sub>2</sub> and (f)  
 105 CaCN<sub>2</sub>.

106

107 **Table S7** Calculated lattice thermal conductivity ( $\kappa_{3\text{ph}}$  and  $\kappa_{4\text{ph}}$ ), material ID in the Materials  
 108 Project database (mp-id), maximum acoustic branch frequency ( $f_{a,\text{max}}$ ), and relative four-phonon  
 109 reduction ( $\kappa_{34}$ ) for materials exhibiting significant four-phonon scattering effects with  $\kappa_{34} > 0.4$ .

| formula                         | mp-id      | $f_{a,\text{max}}$ (THz) | $\kappa_{3\text{ph}}$ (W/mK) | $\kappa_{4\text{ph}}$ (W/mK) | $\kappa_{34}$ |
|---------------------------------|------------|--------------------------|------------------------------|------------------------------|---------------|
| BaLiAs                          | mp-10616   | 2.56                     | 2.15                         | 1.12                         | 0.48          |
| CsK <sub>2</sub> Sb             | mp-581024  | 1.25                     | 0.21                         | 0.11                         | 0.48          |
| GaN                             | mp-804     | 7.22                     | 113.66                       | 66.03                        | 0.42          |
| CuBr                            | mp-22913   | 3.54                     | 0.84                         | 0.43                         | 0.49          |
| RbIO <sub>3</sub>               | mp-27193   | 2.01                     | 1.09                         | 0.62                         | 0.43          |
| NaBiTe <sub>2</sub>             | mp-1221102 | 1.94                     | 0.65                         | 0.37                         | 0.43          |
| K <sub>2</sub> PtC <sub>2</sub> | mp-976876  | 2.65                     | 7.43                         | 3.97                         | 0.47          |

|                                  |            |       |        |       |      |
|----------------------------------|------------|-------|--------|-------|------|
| CaCN <sub>2</sub>                | mp-4124    | 6.85  | 17.33  | 8.70  | 0.50 |
| KCl                              | mp-23193   | 3.72  | 6.61   | 3.60  | 0.46 |
| Na <sub>2</sub> CN <sub>2</sub>  | mp-541989  | 5.00  | 4.27   | 2.06  | 0.52 |
| BaO <sub>2</sub>                 | mp-1105    | 4.18  | 1.35   | 0.73  | 0.46 |
| MgCN <sub>2</sub>                | mp-9166    | 9.07  | 24.36  | 12.24 | 0.50 |
| NaSbTe <sub>2</sub>              | mp-1220883 | 2.18  | 0.84   | 0.50  | 0.40 |
| RbBrO <sub>3</sub>               | mp-28872   | 2.09  | 0.82   | 0.28  | 0.66 |
| LiRhO <sub>2</sub>               | mp-14115   | 7.96  | 5.36   | 3.08  | 0.43 |
| Rb <sub>2</sub> PtC <sub>2</sub> | mp-10919   | 1.94  | 8.23   | 4.42  | 0.46 |
| LiBeSb                           | mp-1100398 | 4.55  | 108.63 | 45.34 | 0.58 |
| CsI                              | mp-614603  | 1.55  | 1.23   | 0.72  | 0.41 |
| Li <sub>3</sub> Bi               | mp-23222   | 2.47  | 1.14   | 0.65  | 0.43 |
| CdSe                             | mp-1070    | 1.87  | 3.03   | 1.43  | 0.53 |
| Li <sub>2</sub> CN <sub>2</sub>  | mp-9610    | 8.44  | 25.36  | 8.96  | 0.65 |
| AlSb                             | mp-2624    | 4.44  | 64.70  | 32.46 | 0.50 |
| AlN                              | mp-661     | 12.85 | 164.20 | 96.16 | 0.41 |
| RbBr                             | mp-22867   | 2.21  | 3.31   | 1.75  | 0.47 |
| ZnO                              | mp-2133    | 4.88  | 34.72  | 19.64 | 0.43 |
| RbBiS <sub>2</sub>               | mp-30041   | 2.19  | 0.80   | 0.46  | 0.42 |
| K <sub>2</sub> CN <sub>2</sub>   | mp-10408   | 3.32  | 1.65   | 0.70  | 0.58 |

---

110

111

112 **Reference**

- 113 1 Y. Wu, S. Dai, L. Ji, Y. Ding, S. Zeng, J. Yang and L. Zhou, *Phys. Rev. B*, 2024, **110**, 104308.  
114 2 S. L. Shindé and J. S. Goela, Eds., *High Thermal Conductivity Materials*, Springer New York, New York,  
115 NY, 2006.  
116 3 J. Yan, P. Gorai, B. Ortiz, S. Miller, S. A. Barnett, T. Mason, V. Stevanović and E. S. Toberer, *Energy*  
117 *Environ. Sci.*, 2015, **8**, 983–994.  
118 4 S. Liu, Y. Huang, K. Tang, J. Zhou and Z. Sun, *Chem. Eng. J.*, 2025, **520**, 166247.  
119 5 J. He, Y. Xia, S. S. Naghavi, V. Ozoliņš and C. Wolverton, *Nat. Commun.*, 2019, **10**, 719.

120
